# Supplementary material for: Wolf creek XVII part 4: Amplifying lay-rescuer response
Source: PubMed Central journal article supplement — Resusc Plus. 2024 Jan 12;17:100547. doi: 10.1016/j.resplu.2023.100547 (PMC10827540; doi:10.1016/j.resplu.2023.100547), 2024-01-12

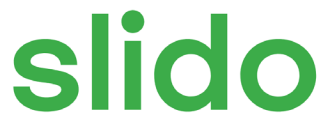

## How we calculate the scores

With the ranking poll, participants essentially give points to each option and the higher someone ranks an option, the more points it receives. Using an example of participants needing to rank 3 options, the option ranked first receives 3 points, the second gets 2 points and the third gets 1 point.

Once voting is over, we count up these points for each option and divide it by the number of people who participated in the ranking poll. This gives us an average, ranked score for each option and the option with the highest score is the most preferred one.

### Example:

- There are 3 people (A, B, C) participating in a poll that consists of three options (X, Y, Z)
- Person A submits the options in the following order: X, Y, Z
- Person B submits the options in the following order: Y, X, Z
- Person C submits the options in the following order: Y, X, Z
- Option X receives 7 points (3 + 2 + 2); Option Y receives 8 points (2 + 3 + 3); Option Z receives 3 points (1 + 1 + 1)
- Average for Option X is 2.3 (7 divided by 3); Average for Option Y is 2.7 (8 divided by 3); Average for Option Z is 1 (3 divided by 3)
- The final order of Options is the following: Y (2.7); X (2.3); Z (1)

In case a participant does not rank all the options, the one they did not pick automatically receives 0 points.

## Amplifying Bystander Response: Knowledge Gaps (82 Votes)

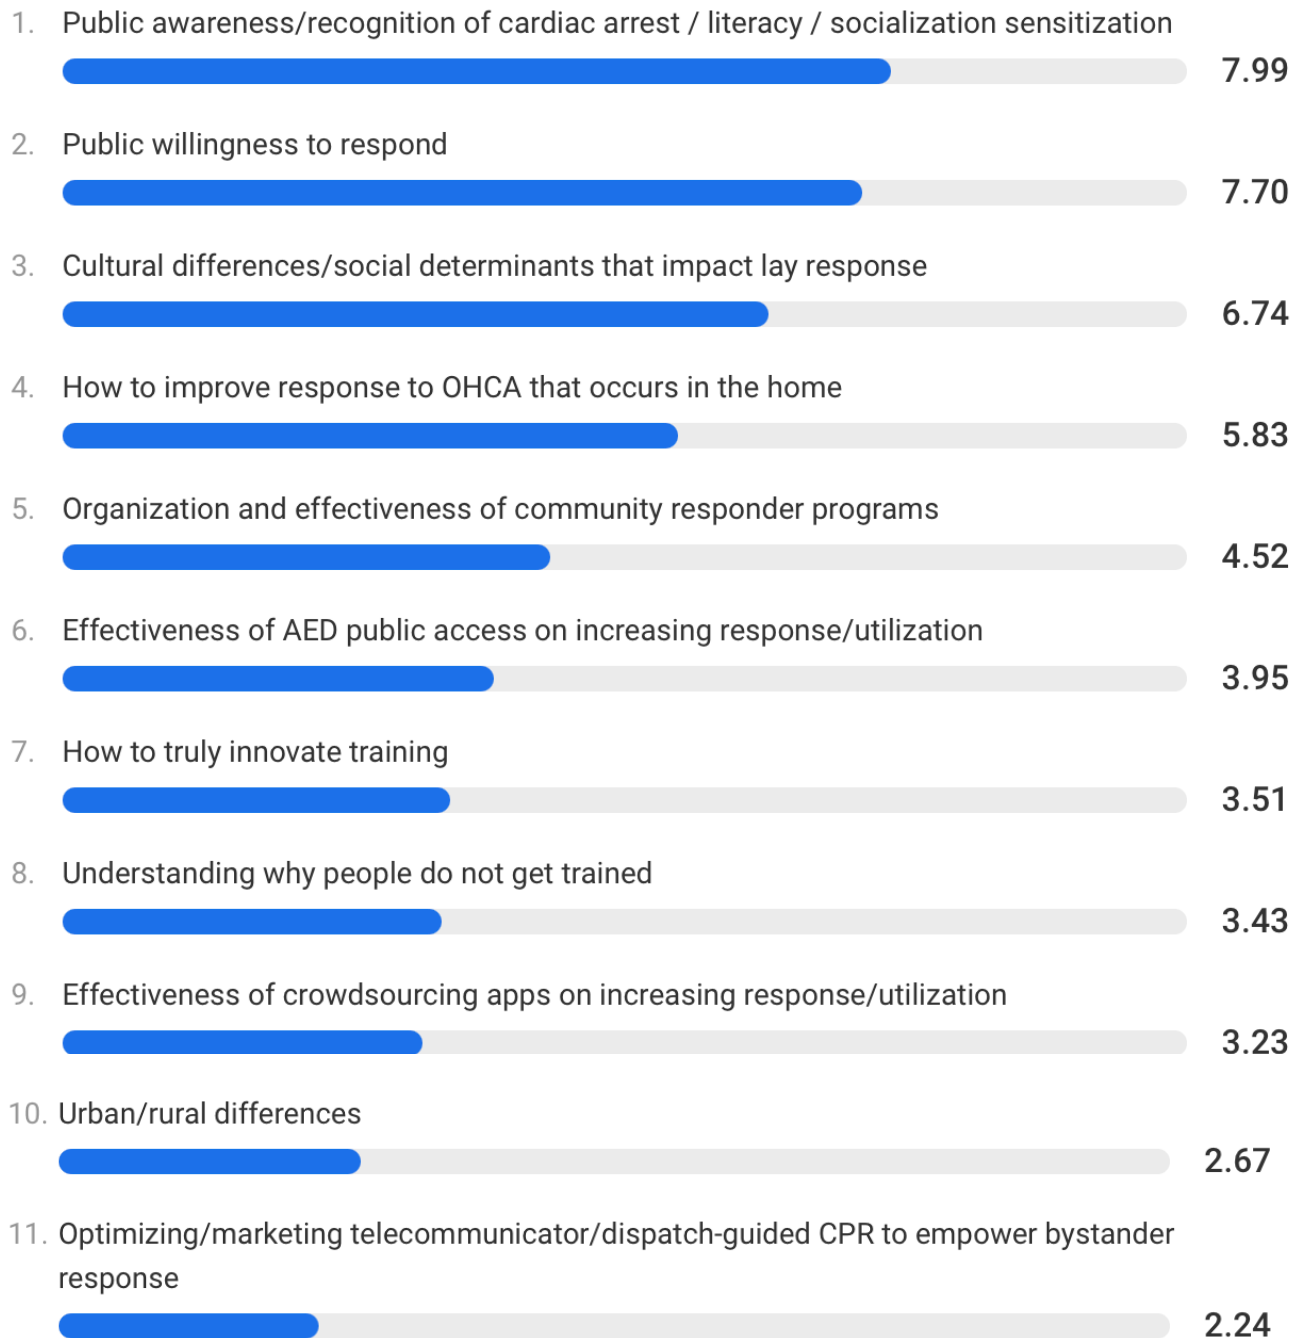

## Amplifying Bystander Response: Barriers to Translation (84 Votes)

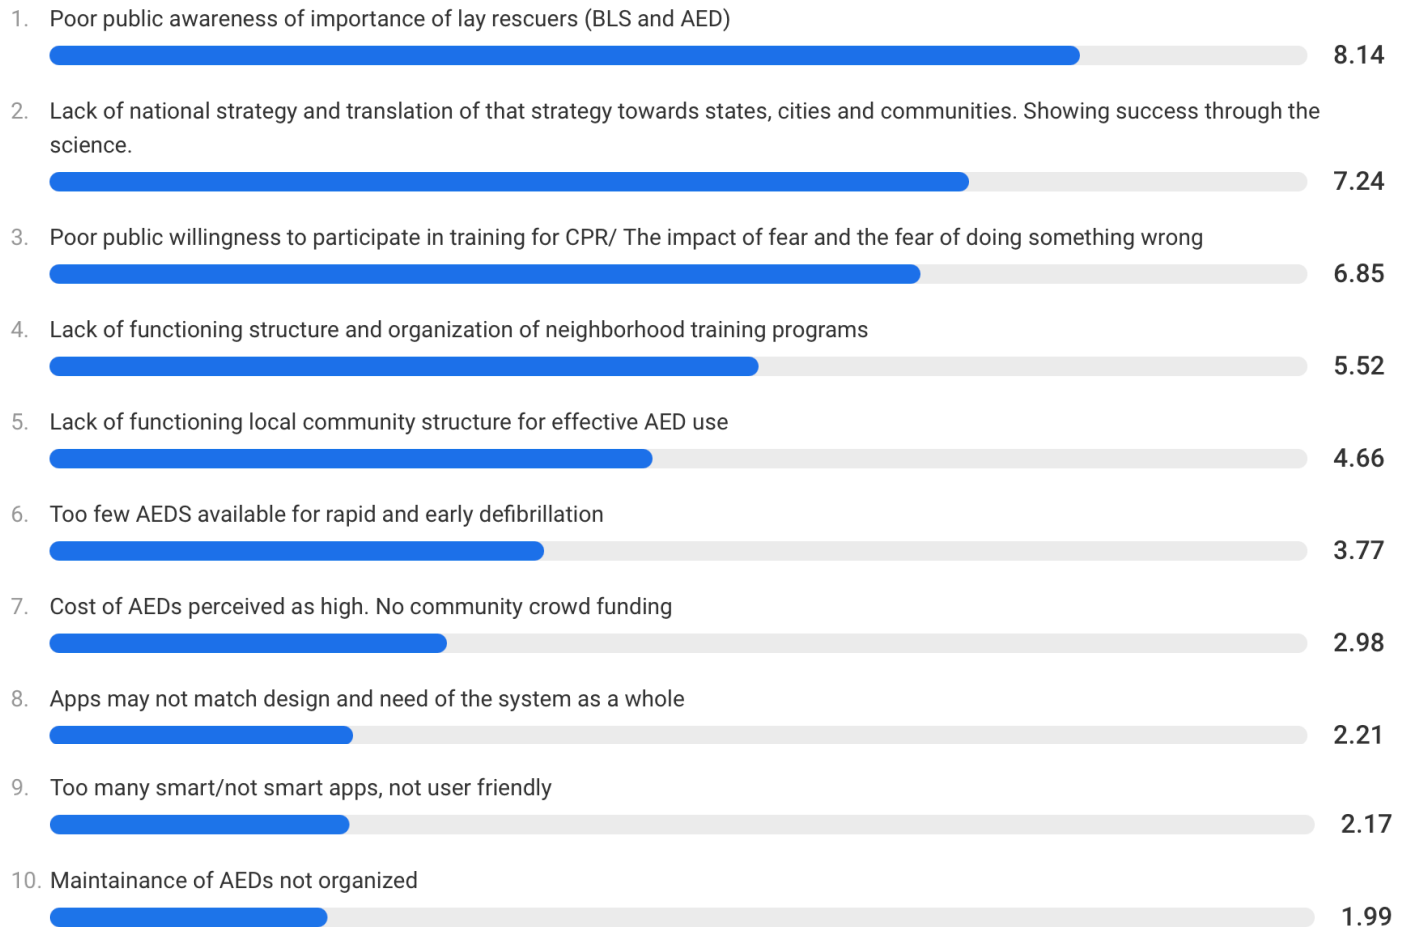

## Amplifying Bystander Response: Research Priorities (83 Votes)

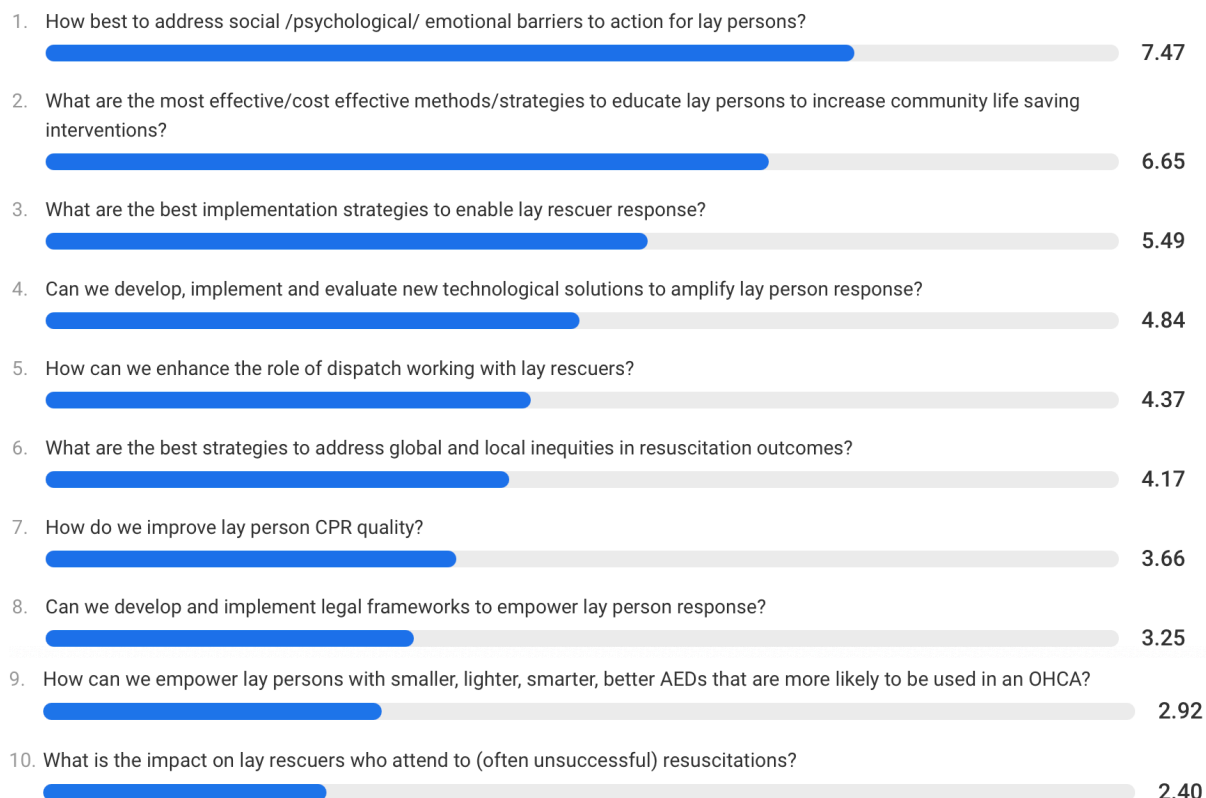

Supplement: mmc1.pdf [file mmc1.pdf]
